# Supplementary material for: A metric learning method for estimating myelin content based on T2-weighted MRI from a de- and re-myelination model of multiple sclerosis
Source: PLoS One. 2021 Apr 5;16(4):e0249460. doi: 10.1371/journal.pone.0249460 (PMC8021181; doi:10.1371/journal.pone.0249460)
Supplement: S2 Table — (DOCX) [file pone.0249460.s007.docx]

**S2 Table: Mean absolute error (MAE) segmentation regression estimates following cross-validation along with use of lesion masks (mean sd).**

| **Tissue** | **Blue (Myelin)** | | **Red (Cellularity)** | |
| --- | --- | --- | --- | --- |
| **Intercept** | **Slope** | **Intercept** | **Slope** |
| SG |  |  |  |  |
| GM |  |  |  |  |
| PV |  |  |  |  |
| WM |  |  |  | 0 |
| Lesion |  |  |  |  |
